# Supplementary material for: A ferroelastic molecular rotator [(Me2N(CH2)2NH3)(18-crown-6)]triflate with dual dielectric switches
Source: Royal Society of Chemistry journal article supplement (doi:10.1039/d2qm00319h), 2022-01-01
Supplement: d2qm00319h1.pdf [file d2qm00319h1.pdf]

## Supporting Information

### A ferroelastic molecular rotator [(Me<sub>2</sub>N(CH<sub>2</sub>)<sub>2</sub>NH<sub>3</sub>)(18-crown-6)]triflate with dual dielectric switches

Meng-Meng Lun,<sup>a</sup> Tie Zhang,<sup>a</sup> Chang-Yuan Su,<sup>a</sup> Jie Li,<sup>a</sup> Zhi-Xu Zhang,<sup>\*a</sup> Da-Wei Fu,<sup>\*a</sup> Hai-Feng Lu<sup>\*b</sup>

<sup>a</sup> Ordered Matter Science Research Center, Jiangsu Key Laboratory for Science and Applications of Molecular Ferroelectrics, Southeast University, Nanjing, 211189, P. R. China. (E-mail: dawei@seu.edu.cn, zhixu@seu.edu.cn)

<sup>b</sup> Institute for Science and Applications of Molecular Ferroelectrics, Key Laboratory of the Ministry of Education for Advanced Catalysis Materials, Zhejiang Normal University, Jinhua, 321004, P.R. China. (E-mail: luhaifeng@zjnu.edu.cn)

#### EXPERIMENTAL MEASUREMENT METHODS

**Single-crystal X-ray Diffraction (SXRD).** The crystallographic structures of compounds were identified by using a Rigaku single-crystal X-ray diffractometer with Mo-K $\alpha$  radiation ( $\lambda = 0.71073 \text{ \AA}$ ). The structures of samples were determined by direct methods and refined by the full matrix method through the SHELXTL software package. All non-hydrogen atoms were refined anisotropically, and all hydrogen atoms which were generated geometrically possessed isotropic displacement parameters. The crystallographic information and structure refinement of compounds are summarized in Table S2. The selected bond lengths and angles, hydrogen bonds of compounds are displayed in Table S3 and S4. Moreover, the crystallographic structures of compounds have been deposited at the Cambridge Crystallographic Data Center (CCDC) (deposition numbers: 2143582-2143585 and 2153009) and can be obtained free of charge from the CCDC *via* [www.ccdc.cam.ac.uk/getstructures](http://www.ccdc.cam.ac.uk/getstructures).

**Powder X-ray Diffraction (PXRD).** The powder X-ray diffraction patterns of microcrystalline compounds were characterized by using a Rigaku D-MAX diffraction

system using Cu- $\alpha$  radiation in the  $2\theta$  range from  $5^\circ$  to  $50^\circ$  with a step size of  $0.02^\circ$  at 298 K. Simulated powder patterns of samples were calculated by Mercury software package using the crystallographic information file from the single-crystal X-ray experiment.

**Infrared (IR) Spectrometry.** The IR spectra of compounds were performed at room temperature using a Shimadzu IR-60 spectrometer in the range from 4000 to  $400\text{ cm}^{-1}$ .

**Dielectric.** For dielectric characterization, these crystals were ground to become powders, and then pressed into a plate with 0.5 mm thickness. Both plate surfaces were coated with silver paste and dried in an oven at 333 K for 5 h. The plate was then used as an electrode to record the curve of temperature-dependent dielectric permittivity  $\varepsilon$  by a Tonghui TH2828A Precision LCR meter with an AC voltage of 1 V.

The complex dielectric permittivity  $\varepsilon$  ( $\varepsilon = \varepsilon' - \varepsilon''$ ), where  $\varepsilon'$  is the real part, and  $\varepsilon''$  is

the imaginary part, dielectric loss  $\tan\delta = \frac{\varepsilon''}{\varepsilon'}$ .

**Differential Scanning Calorimetry (DSC).** DSC measurements of compounds were characterized using a NETZSCH-214 instrument, and microcrystalline compounds were heated and cooled in an aluminum crucible with the rate of 10 K/min.

**Thermogravimetry (TG).** TG curves of compounds were characterized by a NETZSCH STA 449F5 instrument, and microcrystalline compounds were heated and cooled in an aluminum crucible with the rate of 10 K/min under an atmosphere of dry  $\text{N}_2$  flowing at  $20\text{ cm}^3/\text{min}$  in the temperature range of 293-1073 K.

**Ferroelastic Measurement.** For the observation of ferroelastic domain, the crystals of compound **3** were dissolved in the mixed solvent containing methanol and water with a 2:1 ratio to form a precursor solution with 50 mg/mL. The thin film was obtained by using the drop-coating method. Specifically, 20  $\mu\text{L}$  of precursor solution was spread on a clean ITO (indium tin oxide) glass which underwent the surface treatment by an

ozone instrument, and then annealed at 323 K for 30 min. The domain structures were observed by an Olympus BX51TRF polarizing microscope with a variable temperature system, in which the equipped temperature control is INSTEC HCC602.

**Hirshfeld Surfaces Analysis.** Hirshfeld surfaces and the associated 2D fingerprint plots were calculated by the CrystalExplorer program by inputting the crystallographic structure file of the compound generated by SXR. Hirshfeld surfaces of three compounds were obtained using a standard (high) surface resolution, which can provide the information about intermolecular interactions in the crystal. The 2D fingerprint plot is a combination of  $d_e$  and  $d_i$  that provides the summary of intermolecular contacts in the crystal and is in complement to the Hirshfeld surfaces, where  $d_i$  is the distance to the nearest atom center interior to the surface, and  $d_e$  exterior to the surface. The normalized contact distance  $d_{norm}$  is based on  $d_e$ ,  $d_i$  and the van der Waals (vdW) radii of the two atoms external ( $r_e^{vdW}$ ) and internal ( $r_i^{vdW}$ ) to the surface:

$$d_{norm} = \frac{d_i - r_i^{vdW}}{r_i^{vdW}} + \frac{d_e - r_e^{vdW}}{r_e^{vdW}}$$

$d_{norm}$  surface is used for the identification of close intermolecular interactions. The value  $d_{norm}$  is negative or positive when intermolecular contacts are shorter or longer than  $r^{vdW}$ , respectively. Hirshfeld surface with  $d_{norm}$  values display a red-blue-white color scheme: where red regions correspond to closer contacts and negative  $d_{norm}$  value; the blue regions correspond to longer contacts and positive  $d_{norm}$  value; and the white regions correspond to the distance of contacts is exactly the van der Waals separation and with a  $d_{norm}$  value of zero.

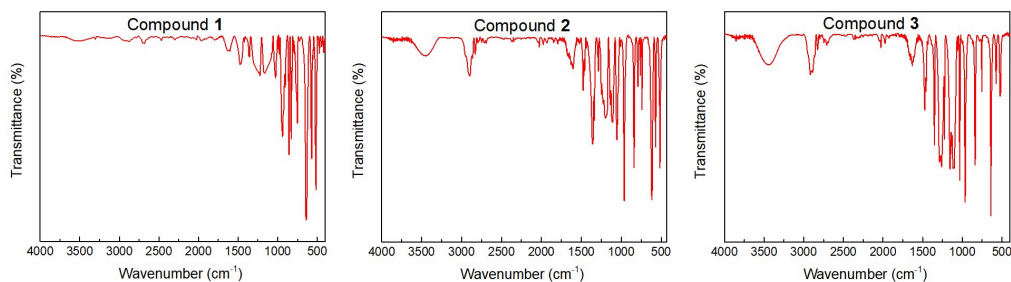

**Fig. S1** IR spectra of compounds measured at room temperature. The peaks in the range of 1360-1200  $\text{cm}^{-1}$  are assigned to the characteristic absorption of crown ether molecules; the peaks in the range of 1730-1550 and 3600-3100  $\text{cm}^{-1}$  correspond the vibrational absorption of  $\text{NH}_3^+$  and -OH in  $\text{H}_2\text{O}$ , respectively; the characteristic peaks of sulfone and C-F bond are located in the vicinity of 1630 and 1030  $\text{cm}^{-1}$ , respectively.

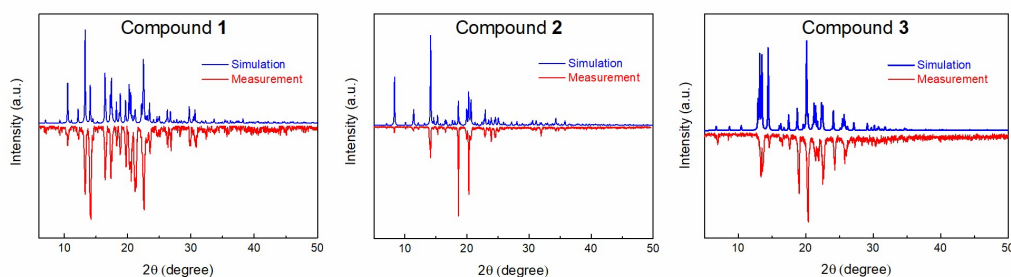

**Fig. S2** The measured and simulated PXRD patterns of compounds at room temperature.

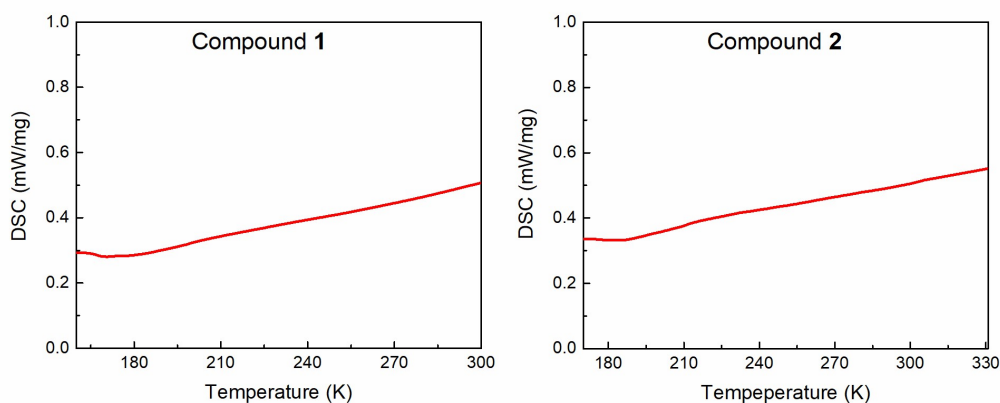

**Figure S3.** DSC curves of compound 1 and 2 in heating run.

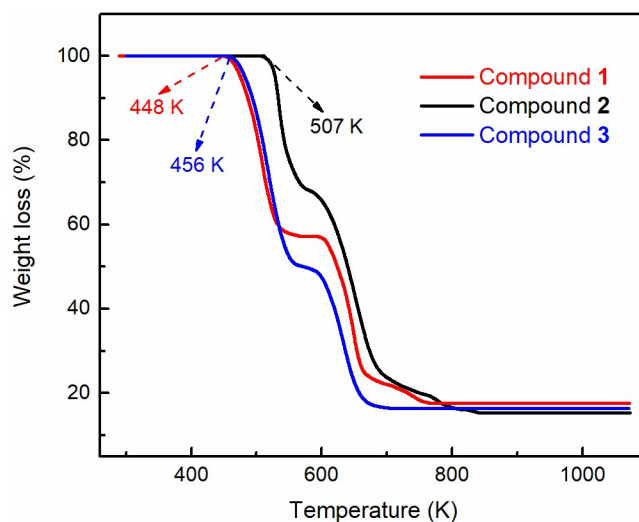

**Fig. S4** TG curves of compounds in the temperature range of 293 to 1073 K.

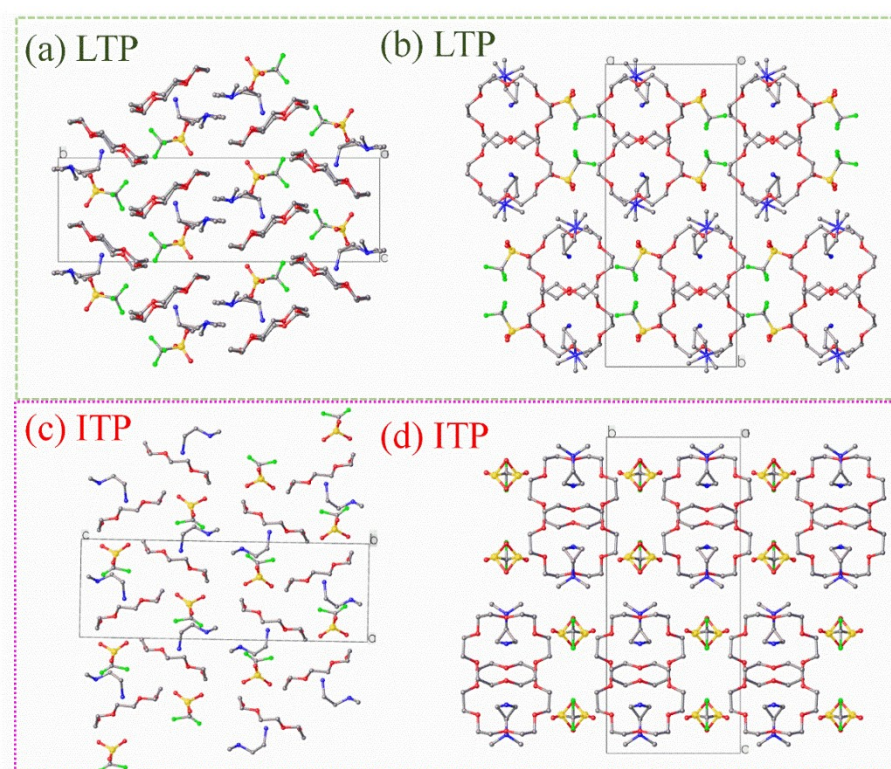

**Fig. S5** Packing views of compound 3 in the LTP (a, b) and HTP (b, c). Hydrogen atoms are omitted for clarity.

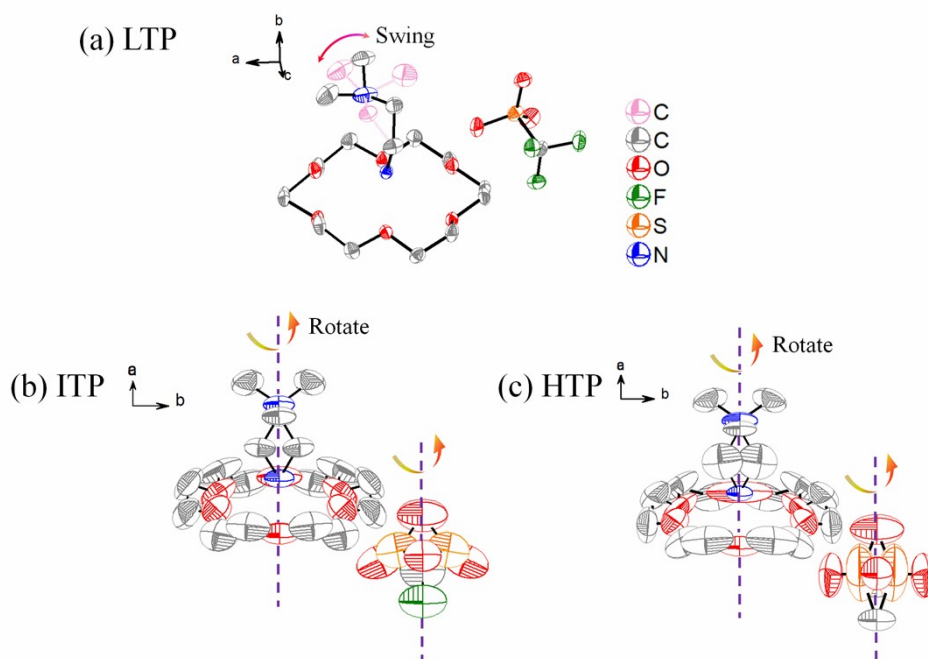

**Fig. S6** Displacement ellipsoids of compound **3** at different temperatures were drawn at the 30% probability level. Hydrogen atoms were omitted for clarity.

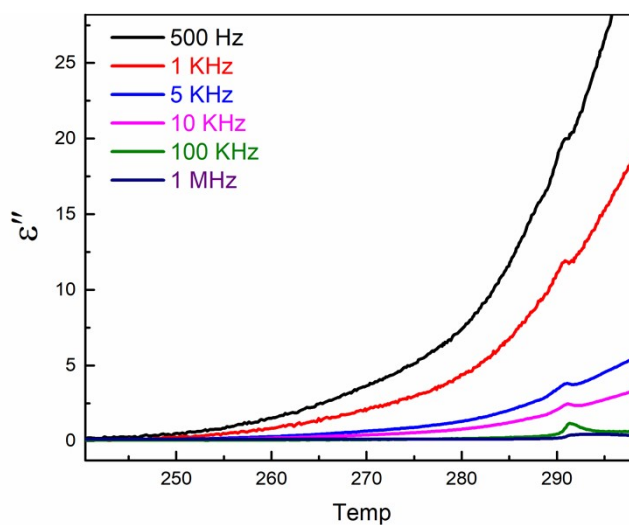

**Fig. S7** The dielectric loss as a function of temperature for compound **3** measured at different frequencies on cooling.

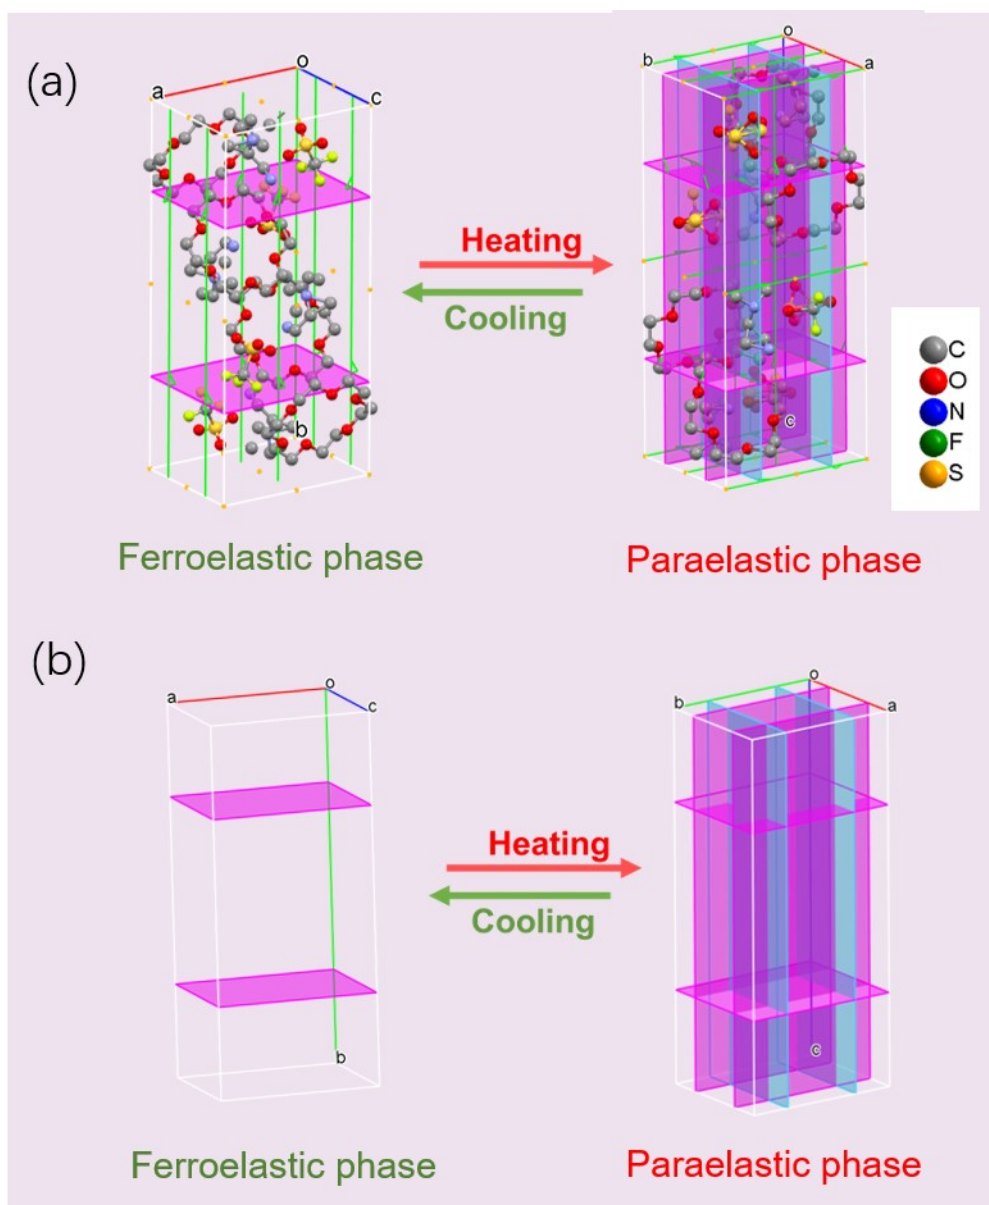

**Fig. S8** (a) All symmetry operations of compound **3** in ferroelastic and prototypical unit cells. (b) Partial symmetry operations showed for clarity, and the same symmetrical elements  $E$ ,  $C_2$ ,  $i$ ,  $\sigma_h$  as well as all atoms in the unit cells were omitted.

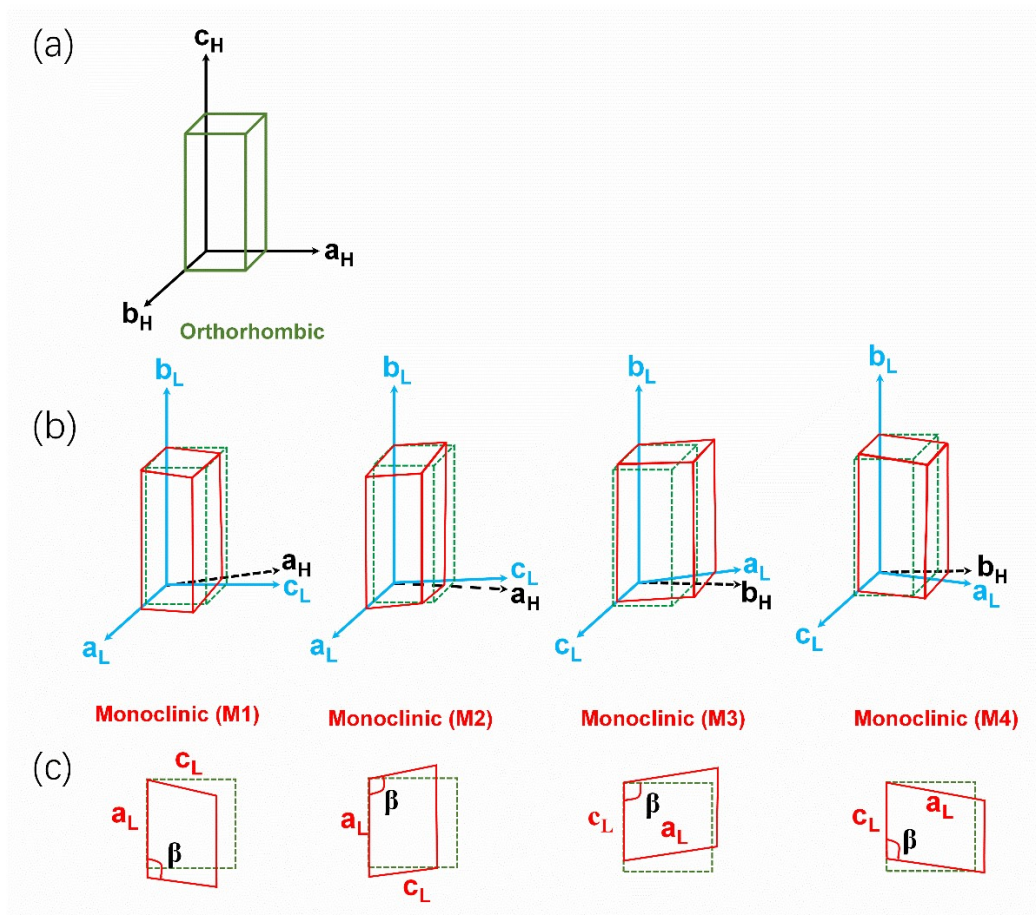

**Fig. S9** (a) The crystal lattice of compound **3** crystallized as paraelastic phase. (b) The comparison of the crystal lattices of compound **3** between the paraelastic (green dot line) and ferroelastic (red line) phase. (c) The associated projection of the (010) plane for the ferroelastic phase.

**Table S1.** Selected known crown ether-based ferroelastics in molecular motor crystals.

| Structure | Chemical name                                         | Ferroelastic phase | Paraelastic phase | $T_c$ (K) | Aizu notation | References |
|-----------|-------------------------------------------------------|--------------------|-------------------|-----------|---------------|------------|
|           | $[(H_3O)(18\text{-Crown-}6)]PF_6$                     | $P2_1/c$ (No.14)   | $Pnma$ (No.62)    | 287.2     | $mmmF2/m$     | 1          |
|           | $[(4\text{-ethylanilinium})(18\text{-crown-}6)]BF_4$  | $P2_1/c$ (No.14)   | $Pnma$ (No.62)    | 180       | $mmmF2/m$     | 2          |
|           | $[(\text{cyclopentylamine})(18\text{-crown-}6)]ClO_4$ | $C2/c$ (No.15)     | $Pbcn$ (No.60)    | 187.4     | $mmmF2/m$     | 3          |



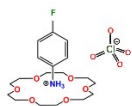

[(4-fluorobenzylammonium)(18-crown-6)]ClO<sub>4</sub>

*P*2<sub>1</sub> (No.4)

*Cmc*2<sub>1</sub>  
(No.36)

208

*mm*2F2

4

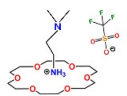

[(Me<sub>2</sub>N(CH<sub>2</sub>)<sub>2</sub>NH<sub>3</sub>)(18-crown-6)]triflate

*P*2<sub>1</sub>/*c* (No.14)

*Pnma*  
(No.62)

295

*mmm*F2/*m*

**This work**

---

**Table S2.** Crystal data and structure refinement for compounds

| Compound                                                   | Compound 1                                                                     | Compound 2                                                                                   | Compound 3                      |                                                                                |                     |
|------------------------------------------------------------|--------------------------------------------------------------------------------|----------------------------------------------------------------------------------------------|---------------------------------|--------------------------------------------------------------------------------|---------------------|
| Empirical formula                                          | C <sub>15</sub> H <sub>33</sub> F <sub>3</sub> N <sub>2</sub> O <sub>8</sub> S | C <sub>18</sub> H <sub>37</sub> F <sub>6</sub> N <sub>3</sub> O <sub>10</sub> S <sub>2</sub> |                                 | C <sub>17</sub> H <sub>37</sub> F <sub>3</sub> N <sub>2</sub> O <sub>9</sub> S |                     |
| Formula weight                                             | 458.49                                                                         | 633.62                                                                                       |                                 | 502.55                                                                         |                     |
| Crystal system                                             | Monoclinic                                                                     | Monoclinic                                                                                   | Monoclinic                      | Orthorhombic                                                                   | Orthorhombic        |
| Space group                                                | <i>P2<sub>1</sub>/c</i> (No.14)                                                | <i>P2<sub>1</sub>/n</i> (No.14)                                                              | <i>P2<sub>1</sub>/c</i> (No.14) | <i>Pnma</i> (No.62)                                                            | <i>Pnma</i> (No.62) |
| Temperature                                                | 223 K                                                                          | 293 K                                                                                        | 243 K                           | 299 K                                                                          | 308 K               |
| a (Å)                                                      | 9.1334(3)                                                                      | 9.0270(3)                                                                                    | 11.2767(7)                      | 8.9025(5)                                                                      | 8.9299(6)           |
| b (Å)                                                      | 24.9176(9)                                                                     | 15.4322(6)                                                                                   | 26.0498(18)                     | 11.0151(7)                                                                     | 10.9955(10)         |
| c (Å)                                                      | 10.5204(4)                                                                     | 21.430(1)                                                                                    | 8.4301(6)                       | 26.0682(16)                                                                    | 26.179(3)           |
| α                                                          | 90°                                                                            | 90°                                                                                          | 90°                             | 90°                                                                            | 90°                 |
| β                                                          | 105.358(1) °                                                                   | 99.370(4)°                                                                                   | 93.060(6)°                      | 90°                                                                            | 90°                 |
| γ                                                          | 90°                                                                            | 90°                                                                                          | 90°                             | 90°                                                                            | 90°                 |
| V (Å <sup>3</sup> )                                        | 2308.76(14)                                                                    | 2945.5(2)                                                                                    | 2472.9(3)                       | 2556.3(3)                                                                      | 2570.4(4)           |
| Z                                                          | 4                                                                              | 4                                                                                            | 4                               | 4                                                                              | 4                   |
| Radiation                                                  | Mo-K <sub>α</sub>                                                              | Mo-K <sub>α</sub>                                                                            | Mo-K <sub>α</sub>               | Mo-K <sub>α</sub>                                                              | Mo-K <sub>α</sub>   |
| Calculated density (g/cm <sup>3</sup> )                    | 1.319                                                                          | 1.429                                                                                        | 1.350                           | 1.160                                                                          | 1.127               |
| Absorption coefficient (mm <sup>-1</sup> )                 | 0.204                                                                          | 0.270                                                                                        | 0.20                            | 0.18                                                                           | 0.17                |
| F (000)                                                    | 976                                                                            | 1328                                                                                         | 1072                            | 888                                                                            | 873                 |
| Data collection range                                      | 2.2-25.0°                                                                      | 1.9-26.0°                                                                                    | 1.8-25.0°                       | 2.0-25.0°                                                                      | 2.0-25.0°           |
| R (int)                                                    | 0.091                                                                          | 0.025                                                                                        | 0.039                           | 0.018                                                                          | 0.037               |
| Completeness to θ                                          | 1                                                                              | 1                                                                                            | 1                               | 99.8%                                                                          | 99.7%               |
| Data, restraints, parameters                               | 4066, 245, 281                                                                 | 5781, 7, 376                                                                                 | 4336, 331, 330                  | 2379, 160, 169                                                                 | 2386, 60, 163       |
| Goodness-of-fit on F <sup>2</sup>                          | 1.040                                                                          | 1.036                                                                                        | 1.001                           | 1.005                                                                          | 1.035               |
| R <sub>1</sub> , wR <sub>2</sub> [I > 2σ(I)]               | 0.094, 0.195                                                                   | 0.053, 0.175                                                                                 | 0.131, 0.334                    | 0.233, 0.299                                                                   | 0.183, 0.294        |
| Δρ <sub>max</sub> , Δρ <sub>min</sub> (e Å <sup>-3</sup> ) | 0.90, -0.64                                                                    | 0.42, -0.31                                                                                  | 1.09, -0.63                     | 0.49, -0.44                                                                    | 0.49, -0.38         |

**Table S3.** The selected bond lengths and angles for compounds

| Bond lengths (Å) and bond angles (°) |             |            |             |            |             |
|--------------------------------------|-------------|------------|-------------|------------|-------------|
| <b>Compound 1 at 223 K</b>           |             |            |             |            |             |
| C1—C2                                | 1.478 (4)   | C7—O4      | 1.430 (4)   | C13—N2     | 1.385 (5)   |
| C1—O1                                | 1.406 (4)   | C8—O5      | 1.399 (4)   | C14—N2     | 1.435 (5)   |
| C2—O2                                | 1.424 (3)   | C9—C10     | 1.502 (2)   | C15—F1     | 1.231 (4)   |
| C3—C4                                | 1.488 (4)   | C9—O5      | 1.330 (3)   | C15—F2     | 1.323 (5)   |
| C3—O2                                | 1.430 (3)   | C10—O1     | 1.405 (4)   | C15—F3     | 1.318 (5)   |
| C4—O3                                | 1.420 (4)   | C11—C12    | 1.540 (8)   | C15—S1     | 1.793 (3)   |
| C5—C6                                | 1.493 (5)   | C11—C12'   | 1.423 (7)   | O6—S1      | 1.403 (2)   |
| C5—O3                                | 1.415 (3)   | C11—N1     | 1.461 (3)   | O7—S1      | 1.426 (3)   |
| C6—O4                                | 1.416 (4)   | C12—N2     | 1.406 (8)   | O8—S1      | 1.381 (3)   |
| C7—C8                                | 1.497 (4)   | N1—C11—C12 | 113.9 (3)   | O1—C1—C2   | 108.1 (2)   |
| O2—C2—C1                             | 111.8 (2)   | N2—C12—C11 | 112.1 (4)   | C13—N2—C12 | 92.6 (4)    |
| O2—C3—C4                             | 108.0 (2)   | F1—C15—F2  | 109.4 (4)   | O8—S1—O7   | 116.2 (2)   |
| O3—C4—C3                             | 108.5 (2)   | F1—C15—F3  | 109.9 (4)   | C13—N2—C14 | 105.1 (4)   |
| O3—C5—C6                             | 108.0 (2)   | F1—C15—S1  | 112.6 (3)   | C10—O1—C1  | 105.7 (2)   |
| O4—C6—C5                             | 108.5 (3)   | F2—C15—S1  | 111.1 (3)   | C2—O2—C3   | 113.7 (2)   |
| O4—C7—C8                             | 112.3 (3)   | F3—C15—F2  | 102.4 (3)   | C5—O3—C4   | 113.0 (2)   |
| O5—C8—C7                             | 107.9 (3)   | F3—C15—S1  | 110.9 (3)   | C6—O4—C7   | 113.3 (2)   |
| O5—C9—C10                            | 115.9 (2)   | C12—N2—C14 | 131.8 (4)   | C9—O5—C8   | 114.4 (2)   |
| O1—C10—C9                            | 114.3 (2)   | O8—S1—C15  | 105.07 (16) | O6—S1—C15  | 104.16 (18) |
| O8—S1—O6                             | 116.22 (19) |            |             |            |             |
| <b>Compound 2 at 293 K</b>           |             |            |             |            |             |
| C1—C2                                | 1.494 (5)   | C9—O6      | 1.408 (4)   | C17—F2     | 1.328 (4)   |
| C1—O2                                | 1.401 (4)   | C10—O1     | 1.431 (4)   | C17—F3     | 1.318 (4)   |
| C2—O3                                | 1.413 (4)   | C11—C12    | 1.489 (5)   | C17—S1     | 1.806 (3)   |
| C3—C4                                | 1.487 (5)   | C11—O1     | 1.405 (4)   | C18—F4     | 1.321 (3)   |
| C3—O3                                | 1.401 (4)   | C12—O2     | 1.421 (4)   | C18—F5     | 1.312 (4)   |
| C4—O4                                | 1.417 (4)   | C13—C14    | 1.443 (7)   | C18—F6     | 1.296 (4)   |
| C5—C6                                | 1.486 (5)   | C13—C14'   | 1.337 (8)   | C18—S2     | 1.816 (3)   |
| C5—O4                                | 1.396 (4)   | C13—N1     | 1.474 (4)   | N3—S1      | 1.569 (3)   |
| C6—O5                                | 1.420 (4)   | C14—N2     | 1.434 (6)   | N3—S2      | 1.557 (2)   |
| C7—C8                                | 1.483 (5)   | C14'—N2    | 1.509 (7)   | O7—S1      | 1.422 (2)   |
| C7—O5                                | 1.402 (4)   | C15—N2     | 1.416 (5)   | O8—S1      | 1.397 (2)   |
| C8—O6                                | 1.425 (4)   | C16—N2     | 1.422 (5)   | O9—S2      | 1.416 (3)   |
| C9—C10                               | 1.480 (5)   | C17—F1     | 1.315 (4)   | O10—S2     | 1.424 (2)   |
| O2—C1—C2                             | 109.7 (3)   | F1—C17—F3  | 108.3 (3)   | C11—O1—C10 | 112.5 (2)   |

|             |             |             |             |            |             |
|-------------|-------------|-------------|-------------|------------|-------------|
| O3—C2—C1    | 109.5 (3)   | F1—C17—S1   | 111.6 (2)   | C1—O2—C12  | 112.3 (2)   |
| O3—C3—C4    | 109.2 (3)   | F2—C17—S1   | 109.7 (2)   | C3—O3—C2   | 113.3 (3)   |
| O4—C4—C3    | 109.2 (3)   | F3—C17—F2   | 108.0 (3)   | C5—O4—C4   | 112.4 (3)   |
| O4—C5—C6    | 109.5 (3)   | F3—C17—S1   | 111.2 (2)   | C7—O5—C6   | 113.2 (2)   |
| O5—C6—C5    | 109.9 (3)   | F4—C18—S2   | 110.0 (2)   | C9—O6—C8   | 113.2 (2)   |
| O5—C7—C8    | 108.0 (3)   | F5—C18—F4   | 107.4 (3)   | N3—S1—C17  | 100.27 (15) |
| O6—C8—C7    | 109.2 (3)   | F5—C18—S2   | 111.1 (2)   | O7—S1—C17  | 103.87 (17) |
| O6—C9—C10   | 109.3 (3)   | F6—C18—F4   | 106.8 (2)   | O7—S1—N3   | 109.92 (15) |
| O1—C10—C9   | 109.2 (3)   | F6—C18—F5   | 109.3 (3)   | O8—S1—C17  | 105.14 (17) |
| O1—C11—C12  | 109.6 (2)   | F6—C18—S2   | 112.1 (2)   | O8—S1—N3   | 117.21 (15) |
| O2—C12—C11  | 110.5 (2)   | C15—N2—C14  | 92.7 (5)    | O8—S1—O7   | 117.75 (17) |
| C14—C13—N1  | 118.1 (4)   | C15—N2—C14' | 129.0 (5)   | N3—S2—C18  | 102.10 (14) |
| C14'—C13—N1 | 117.3 (4)   | C15—N2—C16  | 107.4 (4)   | O9—S2—C18  | 102.14 (16) |
| N2—C14—C13  | 114.5 (5)   | C16—N2—C14  | 131.3 (5)   | O9—S2—N3   | 109.52 (16) |
| C13—C14'—N2 | 116.3 (5)   | C16—N2—C14' | 91.6 (5)    | O9—S2—O10  | 119.15 (19) |
| F1—C17—F2   | 107.8 (3)   | S2—N3—S1    | 127.27 (16) | O10—S2—C18 | 104.96 (15) |
| O10—S2—N3   | 116.26 (15) |             |             |            |             |

---

Compound **3** at 243 K

|           |           |            |           |             |            |
|-----------|-----------|------------|-----------|-------------|------------|
| C1—C2     | 1.476 (9) | C8—O5      | 1.458 (6) | O7—S1       | 1.462 (4)  |
| C1—O1     | 1.449 (6) | C9—C10     | 1.483 (8) | O8—S1       | 1.400 (5)  |
| C2—O2     | 1.443 (6) | C9—O5      | 1.418 (7) | O9—S1       | 1.410 (5)  |
| C17—C4    | 1.526 (8) | C10—O6     | 1.420 (7) | N1—C13      | 1.472 (7)  |
| C17—O2    | 1.412 (7) | C11—C12    | 1.489 (8) | C13—C3      | 1.467 (14) |
| C4—O3     | 1.397 (7) | C11—O6     | 1.397 (7) | N2—C3       | 1.319 (14) |
| C5—C6     | 1.509 (9) | C12—O1     | 1.439 (7) | N2—C14      | 1.366 (15) |
| C5—O3     | 1.411 (7) | C18—F1     | 1.321 (7) | N2—C3A      | 1.332 (15) |
| C6—O4     | 1.407 (7) | C18—F2     | 1.297 (7) | N2—C15      | 1.672 (18) |
| C7—C8     | 1.472 (9) | C18—F3     | 1.382 (6) | N2—C14A     | 1.60 (2)   |
| C7—O4     | 1.447 (7) | C18—S1     | 1.840 (6) | N2—C15A     | 1.28 (3)   |
| O1—C1—C2  | 109.5 (4) | O6—C11—C12 | 110.2 (5) | O8—S1—O7    | 113.2 (3)  |
| O2—C2—C1  | 108.5 (5) | O1—C12—C11 | 108.8 (5) | O8—S1—O9    | 120.3 (3)  |
| O2—C17—C4 | 107.4 (5) | C12—O1—C1  | 112.7 (4) | O9—S1—C18   | 102.4 (3)  |
| F1—C18—S1 | 111.8 (4) | C17—O2—C2  | 110.0 (4) | O9—S1—O7    | 113.8 (3)  |
| F2—C18—F1 | 111.9 (5) | C4—O3—C5   | 112.1 (4) | C3—C13—N1   | 112.6 (7)  |
| F2—C18—F3 | 106.8 (4) | C6—O4—C7   | 110.9 (4) | C3—N2—C14   | 139.2 (10) |
| O3—C4—C17 | 108.3 (5) | C9—O5—C8   | 112.0 (4) | C3—N2—C15   | 62.9 (8)   |
| O3—C5—C6  | 107.5 (5) | C11—O6—C10 | 114.2 (4) | C14—N2—C15  | 98.7 (10)  |
| O4—C6—C5  | 108.1 (5) | F1—C18—F3  | 106.1 (4) | C3A—N2—C14A | 58.1 (11)  |

|           |           |           |           |                  |            |
|-----------|-----------|-----------|-----------|------------------|------------|
| O4—C7—C8  | 108.5 (4) | F2—C18—S1 | 111.1 (4) | C15A—N2—C3A      | 151.0 (15) |
| O5—C8—C7  | 107.2 (5) | F3—C18—S1 | 108.9 (4) | C15A—N2—<br>C14A | 107.0 (16) |
| O5—C9—C10 | 107.6 (5) | O7—S1—C18 | 100.4 (3) | N2—C3—C13        | 117.7 (10) |
| O6—C10—C9 | 110.0 (5) | O8—S1—C18 | 103.1 (3) |                  |            |

Compound **3** at 299 K

|           |            |           |           |           |            |
|-----------|------------|-----------|-----------|-----------|------------|
| C1—C2     | 1.557 (9)  | C5—O3     | 1.407 (7) | C10—F1    | 1.422 (11) |
| C1—O1     | 1.461 (6)  | C6—O4     | 1.470 (8) | C10—F2    | 1.101 (10) |
| C2—O2     | 1.375 (7)  | C7—C8     | 1.421 (8) | C10—S1    | 1.624 (8)  |
| C3—C4     | 1.512 (11) | C7—N1     | 1.682 (7) | O5—S1     | 1.705 (7)  |
| C3—O2     | 1.470 (8)  | C8—N2     | 1.441 (6) | O6—S1     | 1.103 (9)  |
| C4—O3     | 1.465 (7)  | C9—N2     | 1.491 (6) | O7—S1     | 1.677 (5)  |
| C5—C6     | 1.356 (10) | O1—C1—C2  | 102.3 (4) | O2—C2—C1  | 109.4 (5)  |
| O2—C3—C4  | 105.8 (6)  | F2—C10—F1 | 132.6 (9) | C10—S1—O5 | 83.1 (4)   |
| O3—C4—C3  | 103.4 (5)  | F2—C10—S1 | 124.1 (6) | C10—S1—O7 | 96.5 (4)   |
| C6—C5—O3  | 105.0 (5)  | C5—O3—C4  | 110.0 (5) | O6—S1—C10 | 75.2 (6)   |
| C5—C6—O4  | 110.4 (5)  | C8—C7—N1  | 106.4 (5) | O6—S1—O5  | 119.7 (5)  |
| C2—O2—C3  | 112.4 (5)  | C7—C8—N2  | 114.3 (5) | O6—S1—O7  | 149.1 (5)  |
| F1—C10—S1 | 92.5 (5)   | C8—N2—C9  | 111.2 (3) | O7—S1—O5  | 88.0 (3)   |

Compound **3** at 308 K

|          |            |            |            |           |            |
|----------|------------|------------|------------|-----------|------------|
| C1—C2    | 1.18 (4)   | C5—C6      | 1.52 (3)   | C11—S1    | 1.795 (19) |
| C2—O2    | 1.37 (3)   | C5—O3      | 1.41 (3)   | O5—S1     | 1.117 (9)  |
| C3—C4    | 1.68 (6)   | C8—N2      | 1.406 (13) | O6—S1     | 1.83 (2)   |
| C3—O2    | 1.25 (4)   | C9—N2      | 1.517 (10) | S1—O8     | 1.73 (2)   |
| C4—O3    | 1.41 (3)   | C10—S1     | 1.86 (2)   | O2—C2—C1  | 136 (4)    |
| O2—C3—C4 | 102 (3)    | C5—O3—C4   | 104 (2)    | O6—S1—O5  | 112.8 (16) |
| O3—C4—C3 | 106 (3)    | C11—S1—C10 | 89.8 (14)  | O8—S1—C10 | 91.5 (11)  |
| O3—C5—C6 | 100 (2)    | O5—S1—C10  | 103.0 (15) | O8—S1—C11 | 139.6 (8)  |
| N2—C8—C7 | 115.7 (11) | O5—S1—C11  | 112.8 (16) | O8—S1—O5  | 106.2 (16) |
| C9—N2—C8 | 107.4 (8)  | O6—S1—C10  | 143.8 (6)  | O8—S1—O6  | 74.6 (13)  |
| C3—O2—C2 | 125 (4)    | O6—S1—C11  | 80.8 (9)   |           |            |

**Table S4.** Hydrogen bonds for compounds [ $\text{\AA}$  and  $^\circ$ ]

| D-H...A | d (D-H) | d (H...A) | d (D...A) | <DHA |
|---------|---------|-----------|-----------|------|
|---------|---------|-----------|-----------|------|

Compound **1** at 223 K

|                            |       |       |       |        |
|----------------------------|-------|-------|-------|--------|
| N1-H1C...O8                | 0.980 | 2.013 | 2.860 | 156.12 |
| N1-H1D... O1               | 0.900 | 2.174 | 3.041 | 161.52 |
| N1-H1D...O2                | 0.900 | 2.337 | 2.852 | 116.24 |
| N1-H1E...O3                | 0.900 | 2.621 | 3.071 | 111.81 |
| N1-H1E...O4                | 0.900 | 1.973 | 2.870 | 173.86 |
| <hr/>                      |       |       |       |        |
| Compound <b>2</b> at 293 K |       |       |       |        |
| N1-H1C...O1                | 0.890 | 2.202 | 2.962 | 142.94 |
| N1-H1C...O2                | 0.890 | 2.197 | 2.905 | 136.15 |
| N1-H1D...O3                | 0.890 | 2.293 | 3.025 | 139.51 |
| N1-H1D...O4                | 0.890 | 2.340 | 2.949 | 125.68 |
| N1-H1E...O5                | 0.890 | 2.118 | 2.966 | 159.12 |
| N1-H1E...O6                | 0.890 | 2.370 | 2.933 | 121.39 |
| <hr/>                      |       |       |       |        |
| Compound <b>3</b> at 243 K |       |       |       |        |
| N1-H1C...O5                | 0.890 | 2.387 | 3.047 | 131.10 |
| N1-H1C...O6                | 0.890 | 2.177 | 2.932 | 142.32 |
| N1-H1D...O1                | 0.890 | 2.443 | 2.934 | 115.18 |
| N1-H1D...O2                | 0.890 | 2.000 | 2.867 | 164.25 |
| N1-H1E...O3                | 0.890 | 2.495 | 2.997 | 116.21 |
| N1-H1E...O4                | 0.890 | 2.181 | 2.975 | 148.34 |
| <hr/>                      |       |       |       |        |

## References

1. Y.-Z. Tang, Z.-F. Gu, C.-S. Yang, B. Wang, Y.-H. Tan and H.-R. Wen, Unusual Two-step Switchable Dielectric Behaviors and Ferroelastic Phase Transition in a Simple 18-Crown-6 Clathrate, *ChemistrySelect*, 2016, **1**, 6772-6776.
2. D.-H. Wu, L. Jin and Y. Zhang, Temperature-triggered Reversible Ferroelastic Phase Transition in an 1:1 Inclusion Complex of 18-crown-6 with 4-Ethylanilinium Tetrafluoroborate, *Inorg. Chem. Commun.*, 2012, **23**, 117-122.
3. Y.-Z. Tang, Z.-F. Gu, J.-B. Xiong, J.-X. Gao, Y. Liu, B. Wang, Y.-H. Tan and Q. Xu, Unusual Sequential Reversible Phase Transitions Containing Switchable

Dielectric Behaviors in Cyclopentyl Ammonium 18-Crown-6 Perchlorate, *Chem. Mater.*, 2016, **28**, 4476-4482.

4. F. Jiang, C.-F. Wang, Y.-X. Wu, H.-H. Li, C. Shi, H.-Y. Ye and Y. Zhang, Nonlinear Optical and Photoluminescence Bistable Responses Accompanied by Tunable Dielectric Behaviors in Crown Inclusions, *J. Phys. Chem. C*, 2020, **124**, 5796-5801.
